# Supplementary material for: Childhood asthma is associated with COPD and known asthma variants in COPDGene: a genome-wide association study
Source: PubMed Central journal article supplement (PMC6206739; doi:10.1186/s12931-018-0890-0), 2018-10-29
Supplement: 12931_2018_890_MOESM1_ESM.pdf [file 12931_2018_890_MOESM1_ESM.pdf]

ADDITIONAL FILE 1

**Table S1: Associations with TAGC Pediatric Asthma GWAS SNPs**

| <b>NHW<sup>a</sup></b>            | <b>Gene</b>             | <b>SNP</b>                   | <b>Locus</b>    | <b>Allele</b> | <b>OR</b>   | <b>P-value<sup>b,d</sup></b> | <b>Adj P<sup>e</sup></b> |
|-----------------------------------|-------------------------|------------------------------|-----------------|---------------|-------------|------------------------------|--------------------------|
| <i>(385 cases, 4979 controls)</i> | <b><i>IL1RL1</i></b>    | <b>rs4988958<sup>f</sup></b> | <b>2q12.1</b>   | <b>T</b>      | <b>1.33</b> | <b>0.0004</b>                | <b>0.002</b>             |
|                                   | <i>IL13</i>             | rs1295685 <sup>f</sup>       | 5q31.1          | A             | 1.18        | 0.073                        | 0.363                    |
|                                   | <b><i>LINC01149</i></b> | <b>rs2596464<sup>f</sup></b> | <b>6p21.33</b>  | <b>C</b>      | <b>1.24</b> | <b>0.004</b>                 | <b>0.021</b>             |
|                                   | <i>IL33</i>             | rs12551256 <sup>f</sup>      | 9p24.1          | G             | 1.08        | 0.284                        | 1.000                    |
|                                   | <b><i>GSDMB</i></b>     | <b>rs8069176<sup>g</sup></b> | <b>17q12-21</b> | <b>G</b>      | <b>1.22</b> | <b>0.008</b>                 | <b>0.041</b>             |
| <b>AA<sup>a</sup></b>             | <b>Gene</b>             | <b>SNP</b>                   | <b>Locus</b>    | <b>Allele</b> | <b>OR</b>   | <b>P-value<sup>b,d</sup></b> | <b>Adj P<sup>e</sup></b> |
| <i>(325 cases, 2342 controls)</i> | <i>IL1RL1</i>           | rs4988958 <sup>f</sup>       | 2q12.1          | C             | 1.00        | 0.991                        | 1.000                    |
|                                   | <i>IL13</i>             | rs1295685 <sup>f</sup>       | 5q31.1          | A             | 1.12        | 0.516                        | 1.000                    |
|                                   | <i>LINC01149</i>        | rs2596464 <sup>f</sup>       | 6p21.33         | C             | 1.10        | 0.246                        | 1.000                    |
|                                   | <i>IL33</i>             | rs12551256 <sup>f</sup>      | 9p24.1          | A             | 1.02        | 0.846                        | 1.000                    |
|                                   | <i>GSDMB</i>            | rs8069176 <sup>g</sup>       | 17q12-21        | A             | 1.02        | 0.824                        | 1.000                    |
| <b>Meta-analysis<sup>a</sup></b>  | <b>Gene</b>             | <b>SNP</b>                   | <b>Locus</b>    | <b>Allele</b> | <b>OR</b>   | <b>P-value<sup>c,d</sup></b> | <b>Adj P<sup>e</sup></b> |
| <i>(710 cases, 7321 controls)</i> | <b><i>IL1RL1</i></b>    | <b>rs4988958<sup>f</sup></b> | <b>2q12.1</b>   | <b>T</b>      | <b>1.18</b> | <b>0.007</b>                 | <b>0.035</b>             |
|                                   | <i>IL13</i>             | rs1295685 <sup>f</sup>       | 5q31.1          | A             | 1.16        | 0.059                        | 0.296                    |
|                                   | <b><i>LINC01149</i></b> | <b>rs2596464<sup>f</sup></b> | <b>6p21.33</b>  | <b>C</b>      | <b>1.18</b> | <b>0.003</b>                 | <b>0.017</b>             |
|                                   | <i>IL33</i>             | rs12551256 <sup>f</sup>      | 9p24.1          | G             | 1.05        | 0.437                        | 1.000                    |
|                                   | <i>GSDMB</i>            | rs8069176 <sup>g</sup>       | 17q12-21        | G             | 1.12        | 0.058                        | 0.291                    |

Abbreviations: TAGC Trans-National Asthma Genetic Consortium, GWAS genome-wide association study; SNP single nucleotide polymorphism; NHW Non-Hispanic Whites; AA African American; OR odds ratio of the effect allele; <sup>a</sup> Each population was run as an independent analysis, and then combined in the meta-analysis; <sup>b</sup> Logistic regression based on case control status; <sup>c</sup> Fixed effect meta-analysis weighted by inverse variance. <sup>d</sup> Adjusted for sex, genetic ancestry. <sup>e</sup> Bonferroni correction for five tests, SNPs with adjusted p<0.05 in **Bold**. <sup>f</sup> SNP is in the reported gene, <sup>g</sup> SNP is near the reported gene.

Figure S1

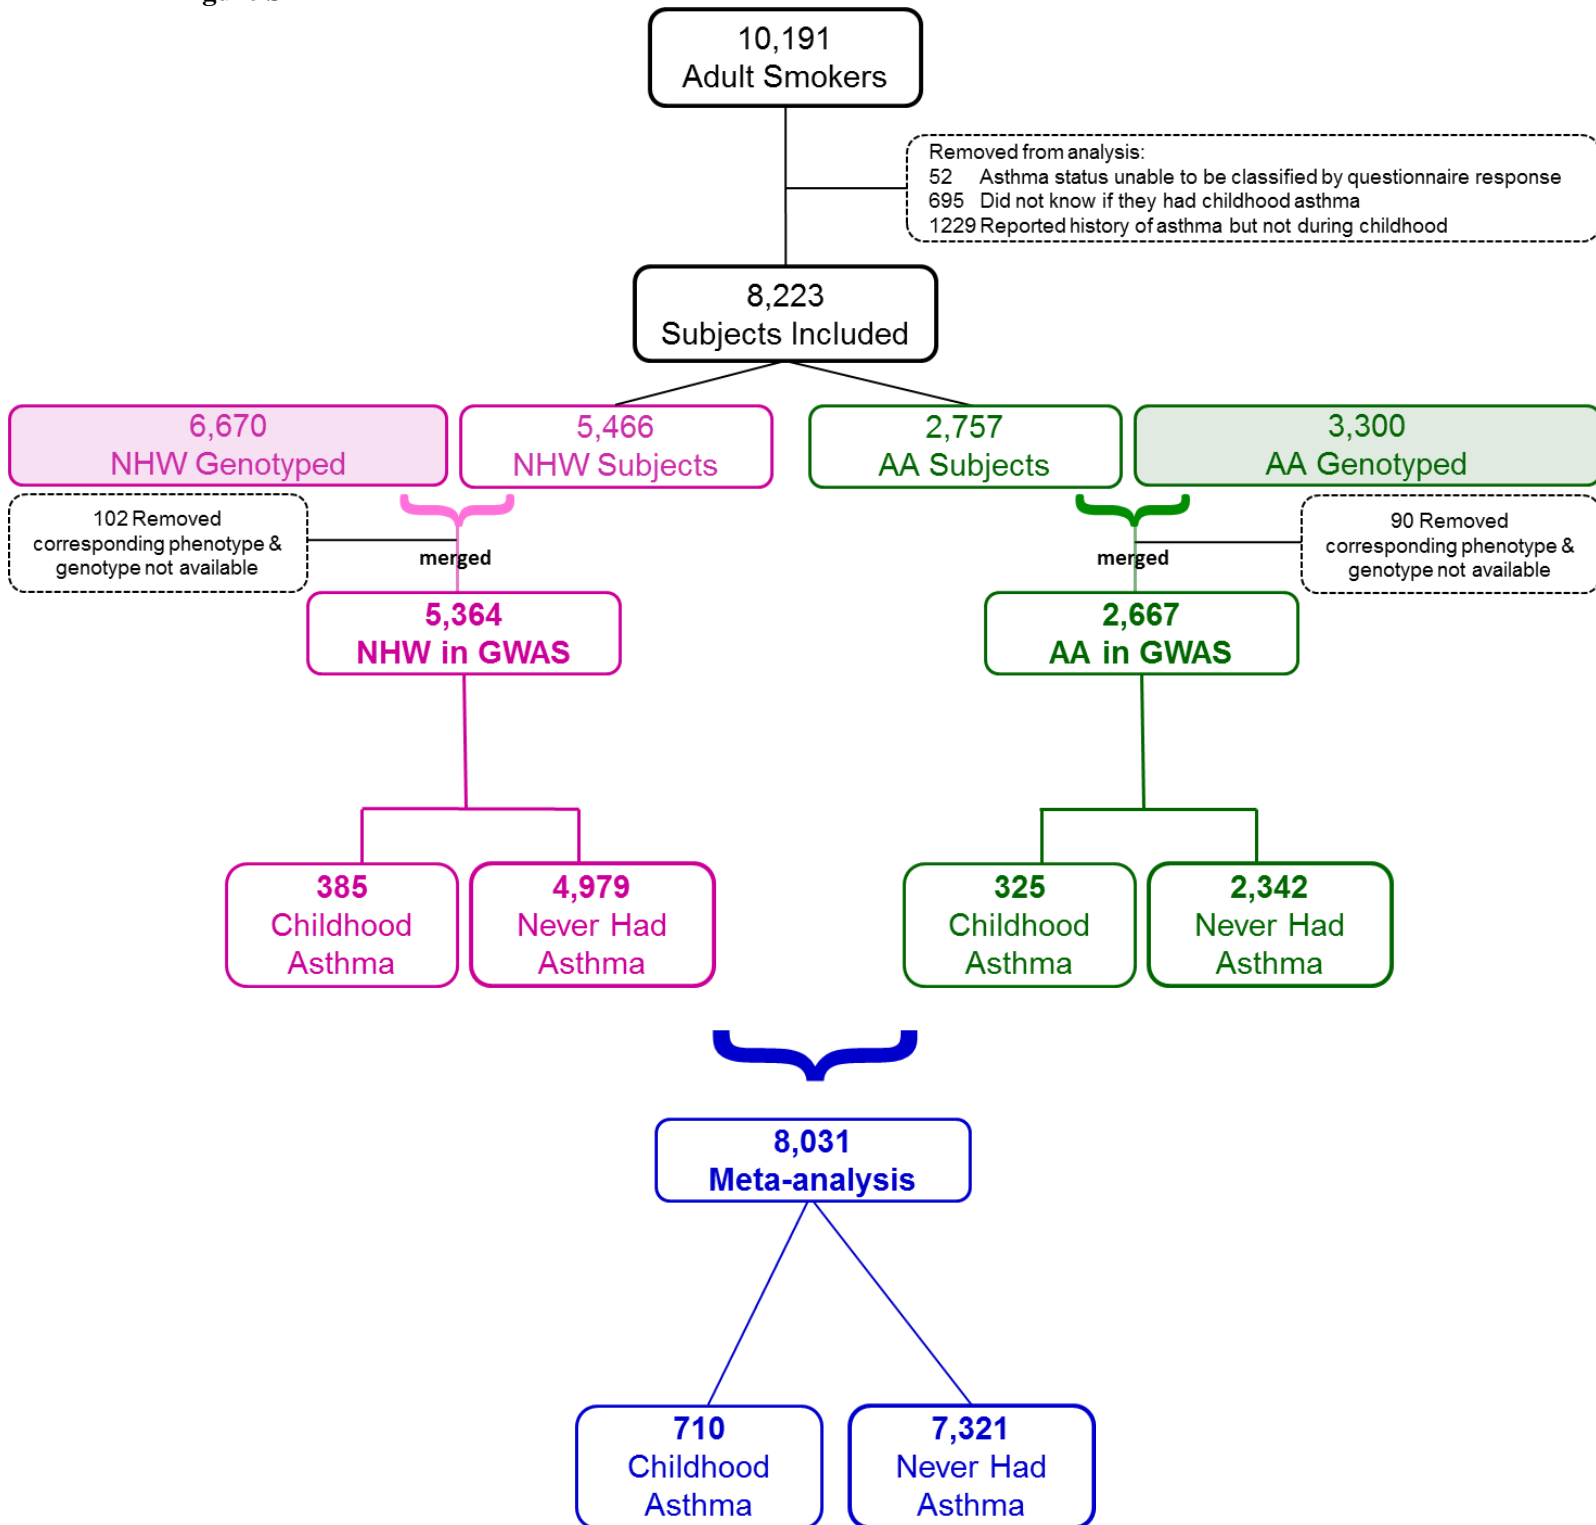

Figure S1: Subject classification. Abbreviations: *NHW* non-Hispanic White; *AA* African American.

**Figure S2**

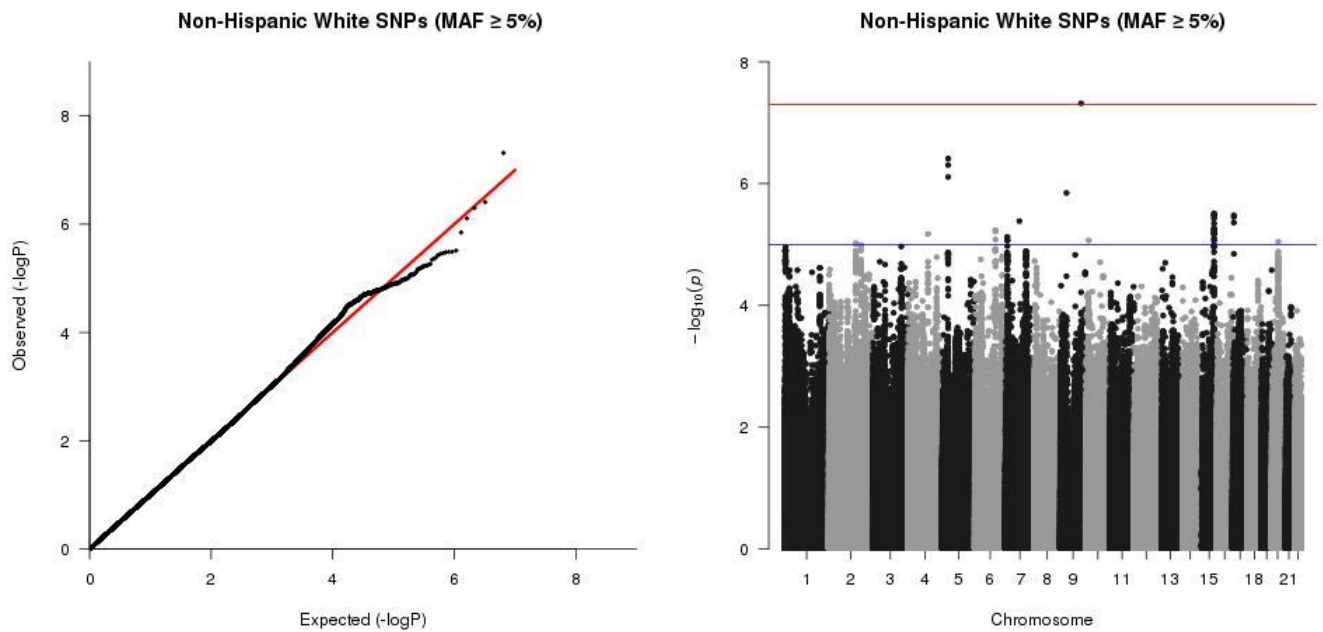

Figure S2: QQ-plot and Manhattan plot of childhood asthma GWAS SNPs in non-Hispanic Whites. Abbreviations: *SNP* single nucleotide polymorphism; *MAF* minor allele frequency.

**Figure S3**

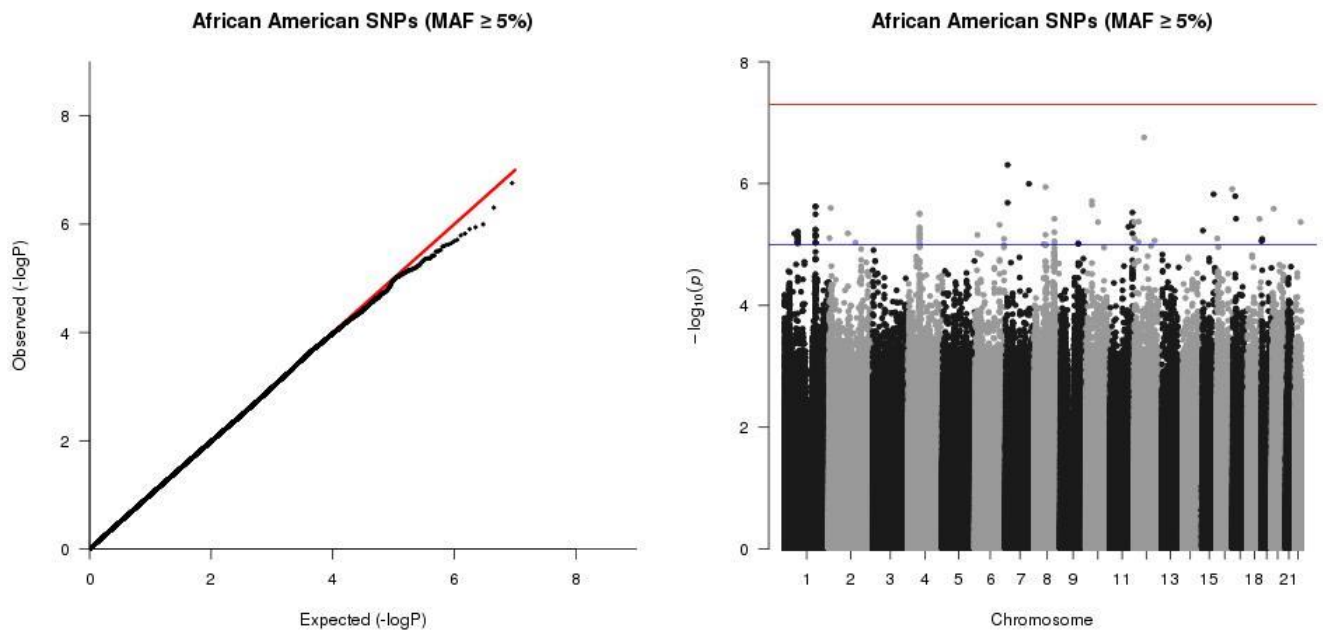

Figure S3: QQ-plot and Manhattan plot of childhood asthma GWAS SNPs in African Americans. Abbreviations: *SNP* single nucleotide polymorphism; *MAF* minor allele frequency.

Figure S4

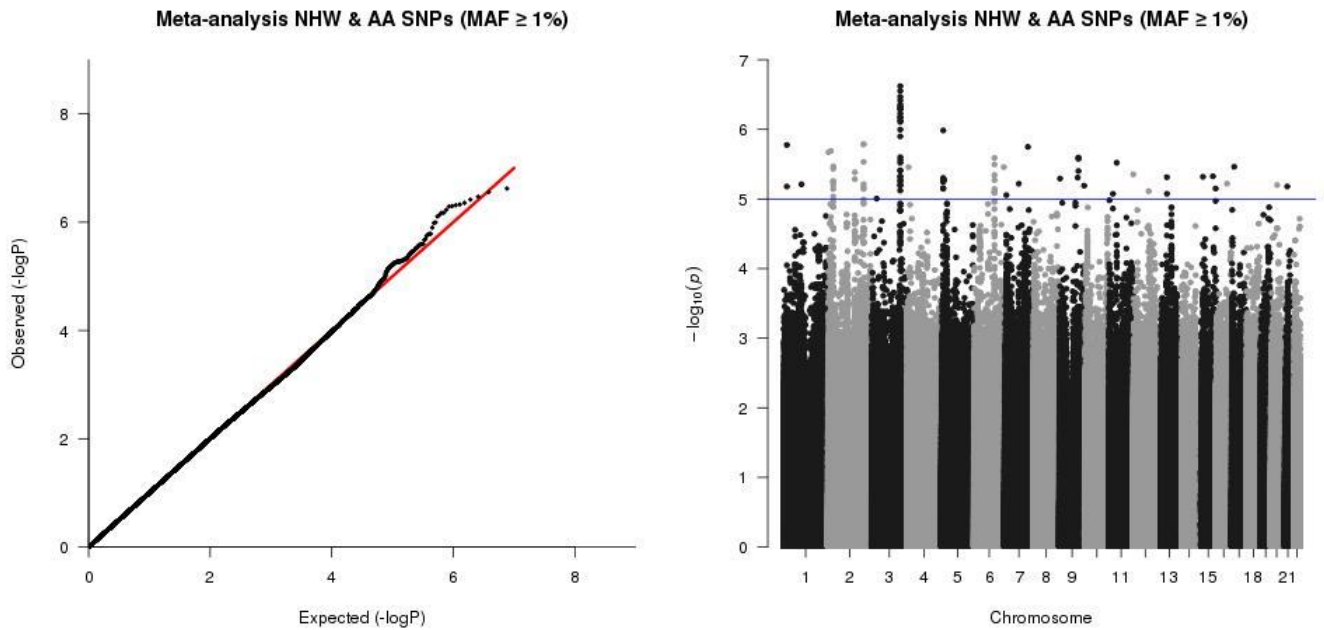

Figure S4: QQ-plot and Manhattan plot of childhood asthma GWAS SNPs from meta-analysis of NHW and AA subjects. Abbreviations: *NHW* non-Hispanic White, *AA* African American, *SNP* single nucleotide polymorphism; *MAF* minor allele frequency.

Figure S5

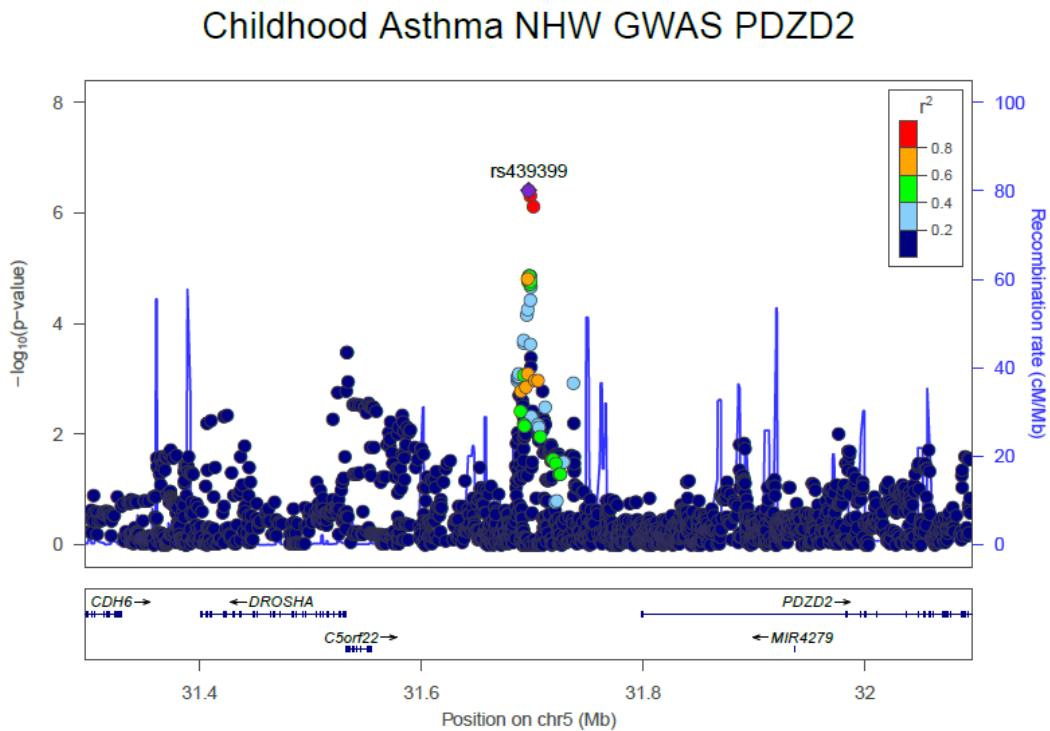

Figure S5: LocusZoom Plots of childhood asthma non-Hispanic white GWAS variants in *PDZD2*.

Figure S6

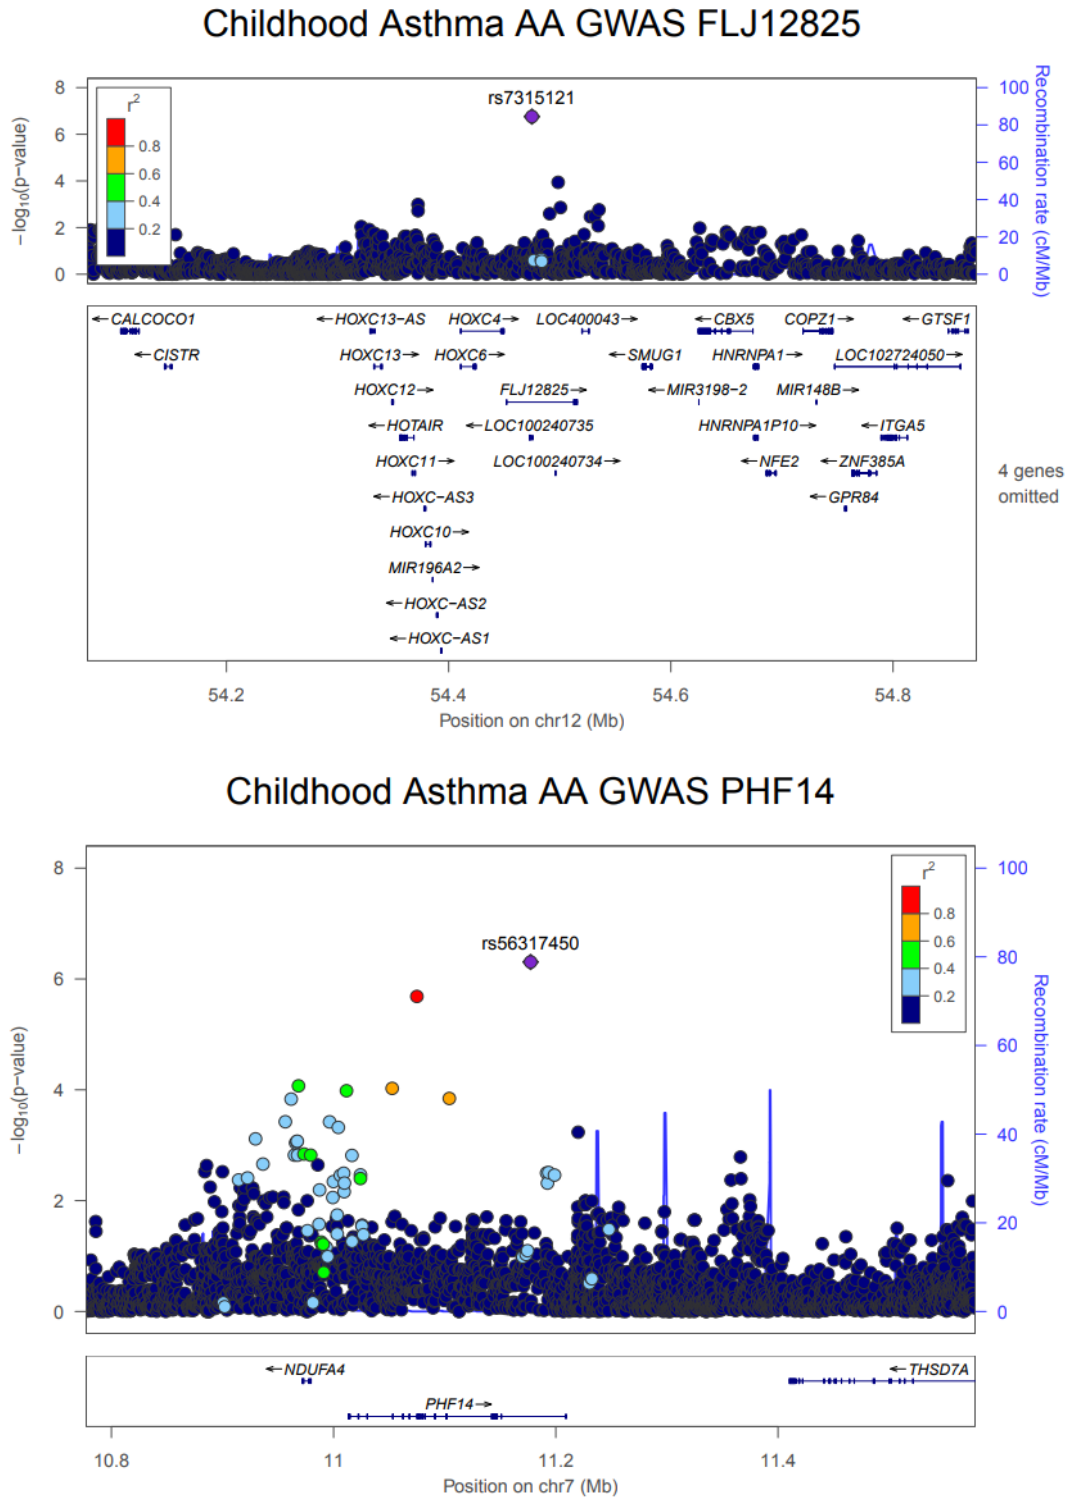

Figure S6: LocusZoom Plots of childhood asthma African American GWAS variants in regions of interest in *FLJ12825* and *PHF14*.

Figure S7

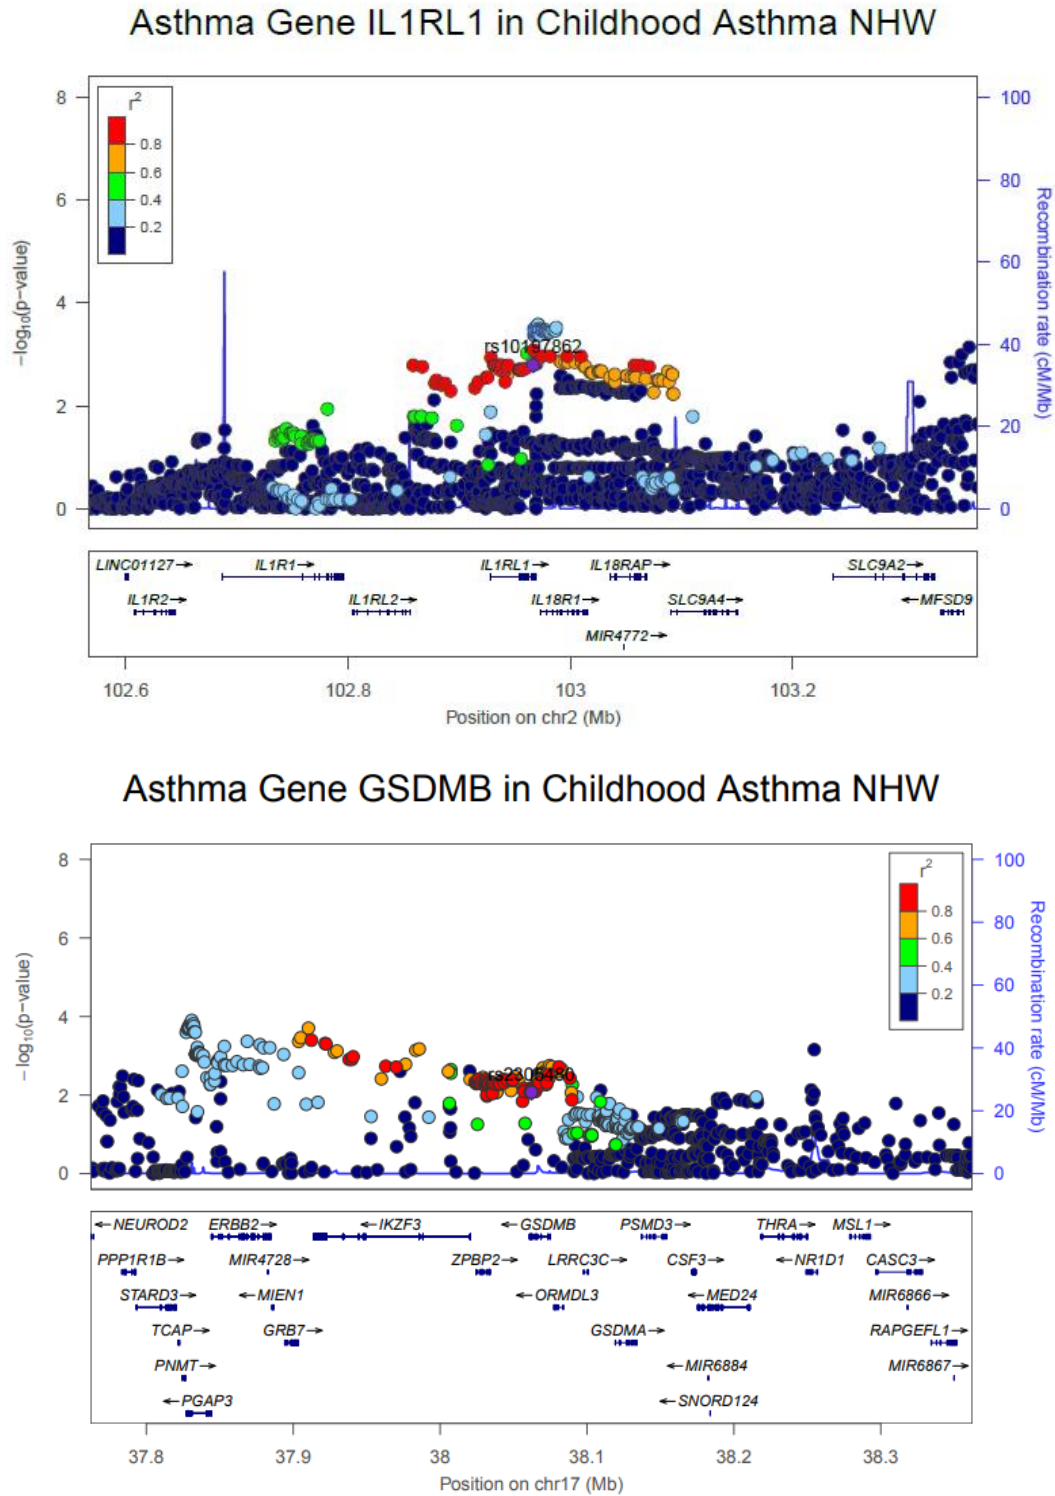

Figure S7: In non-Hispanic whites the childhood asthma GWAS found association with the known asthmal genes *IL1RL1* (rs10197862, adj p = 0.011) and *GSDMB* (rs2305480, adj p = 0.060).

Figure S8

### Asthma Gene IL13 in Childhood Asthma Meta-analysis

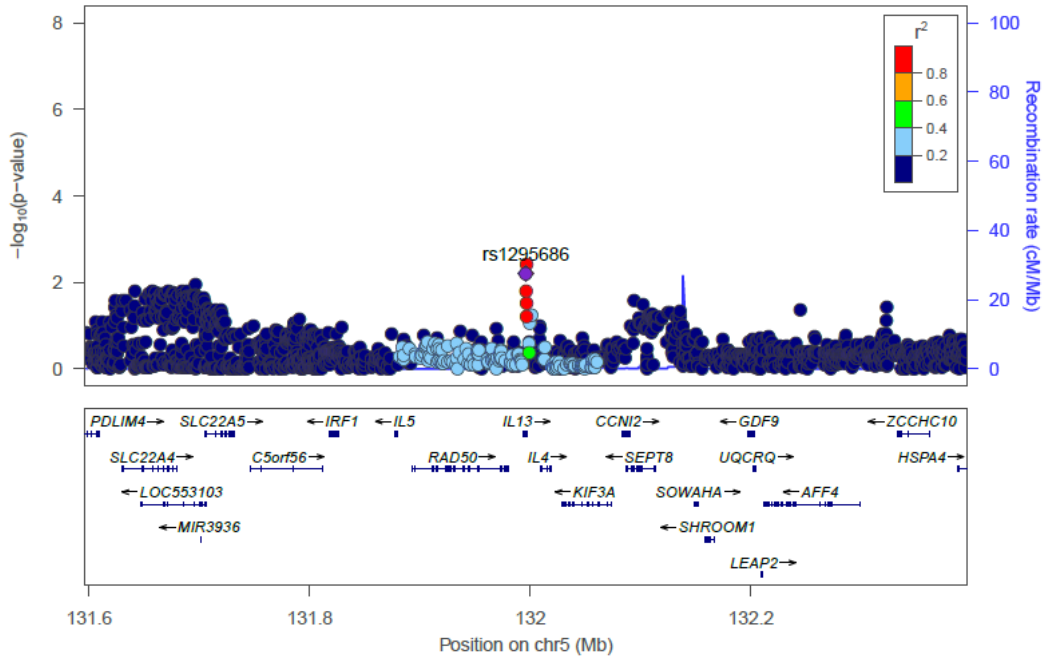

### Asthma Gene C11orf30 in Childhood Asthma Meta-analysis

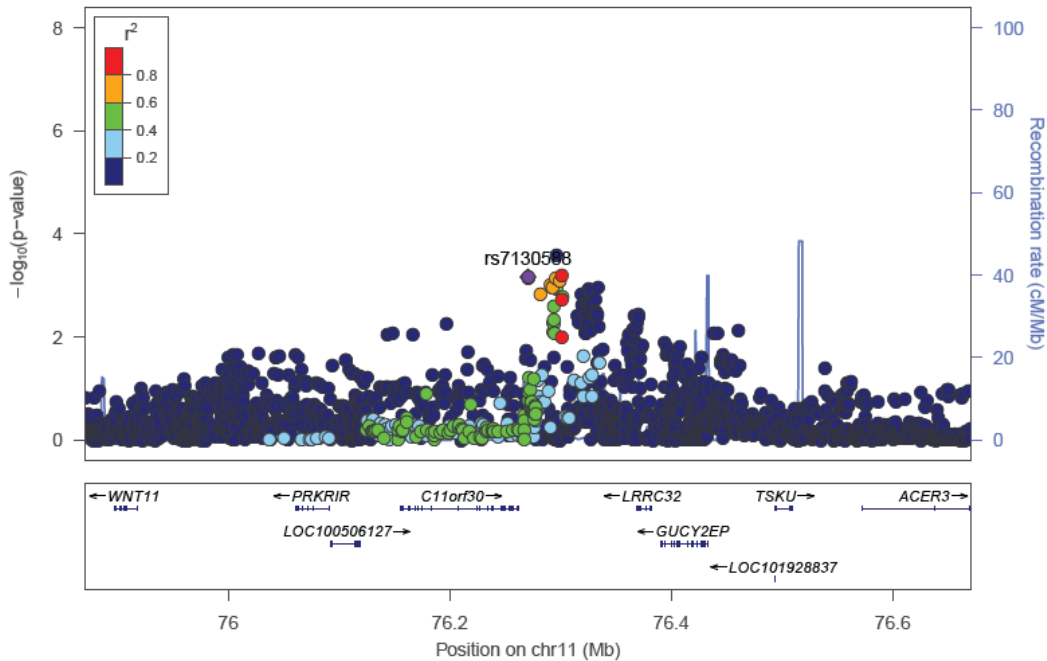

Figure S8: Meta-analysis of NHW and AA subjects in this study found association with a known asthma variants in IL13 (rs1295686) and near the *C11orf30*-*LRRC32* region (rs7130588).
